# Supplementary material
Source: PubMed Central journal article supplement (PMC3076804)
Supplement: NIHMS252373-supplement-3.pdf [file NIHMS252373-supplement-3.pdf]

Alcohol-treated. The red dashed lines indicate the significant region of change in methylation by MeDIP-chip.

## **TABLES**

Table 1. Function and Biology of genes with their DNA methylation altered by alcohol during differentiation in adult rat DRG stem cells validated by Sequenom Mass ARRAY.

Table 2. List of predicted transcription factors binding to *Smarca2* region with DNA methylation increased by alcohol and *Cutl2* region with DNA methylation decreased by alcohol

## **SUPPLEMENTARY MATERIALS**

Supplemental Table 1. Table showing genes with hypermethylation prevented by alcohol from moderate methylation during differentiation.

Supplemental Table 2. Table showing genes with hypomethylation prevented by alcohol from moderate methylation during differentiation.
