# Supplementary material
Source: PubMed Central journal article supplement (PMC3076804)
Supplement: NIHMS252373-supplement-Supp_Table_S1.pdf [file NIHMS252373-supplement-Supp_Table_S1.pdf]

**Supplement Table 1. Alcohol prevented these genes from hypermethylation during differentiation**

| Genbank ID   | Gene.symbol    | Description                                                                                 |
|--------------|----------------|---------------------------------------------------------------------------------------------|
| NM_017270    | Adh4           | alcohol dehydrogenase 4 (class II), pi polypeptide                                          |
| NM_017191    | Adra1a         | adrenergic receptor, alpha 1a                                                               |
| NM_001031654 | Anxa8          | annexin A8                                                                                  |
| NM_019158    | Aqp8           | aquaporin 8                                                                                 |
| NM_022960    | Aqp9           | aquaporin 9                                                                                 |
| BC088147     | Ca5a           | carbonic anhydrase 5a, mitochondrial                                                        |
| NM_080773    | Chrm1          | cholinergic receptor, muscarinic 1                                                          |
| NM_207615    | Clcf1          | cardiotrophin-like cytokine factor 1                                                        |
| NM_182473    | Corin          | corin                                                                                       |
| XM_236253    | Crabp1_mapped  | cellular retinoic acid binding protein 1 (mapped)                                           |
| NM_001002809 | Crebl1         | cAMP responsive element binding protein-like 1                                              |
| XM_220869    | Dlx3_predicted | distal-less homeobox 3 (predicted)                                                          |
| XM_234930    | Edg6_predicted | endothelial differentiation, lysophosphatidic acid G-protein-coupled receptor 6 (predicted) |
| NM_001007554 | Fblim1         | filamin binding LIM protein 1                                                               |
| NM_001013138 | Fbxo23         | F-box only protein 23                                                                       |
| NM_001003974 | Gpsm3          | G-protein signalling modulator 3 (AGS3-like, C. elegans)                                    |
| NM_032990    | Gria3          | glutamate receptor, ionotropic, AMPA3 (alpha 3)                                             |
| NM_032069    | Grip1          | glutamate receptor interacting protein 1                                                    |
| NM_017112    | Hpn            | hepsin                                                                                      |
| NM_022583    | Insl6          | insulin-like 6                                                                              |
| M26161       | Kcna1          | subfamily, member 1                                                                         |
| NM_053771    | Lim2           | lens intrinsic membrane protein 2                                                           |
| NM_001024742 | LOC289482      | similar to MGC10646 protein                                                                 |
| XM_001061901 | LOC291746      | similar to Elongation factor 2 (EF-2)                                                       |
| XM_001054638 | LOC366515      | similar to Wdr8 protein                                                                     |
| NM_001025038 | LOC499465      | hypothetical protein LOC499465                                                              |
| NM_001024343 | LOC500445      | similar to hypothetical protein 4931430D02                                                  |
| NM_001024344 | LOC500449      | similar to SHP2-interacting transmembrane adaptor protein                                   |
| NM_019384    | LOC56081       | CTD-binding SR-like rA1                                                                     |
| XM_001060034 | LOC681037      | hypothetical protein LOC681037                                                              |
| XM_001073690 | LOC690212      | similar to solute carrier family 16, member 5                                               |
| XM_001078541 | LOC691496      | similar to histone 1, H2ai (predicted)                                                      |
| NM_001037794 | MGC125233      | similar to Gene model 443                                                                   |
| NM_181822    | Ncr3           | natural cytotoxicity triggering receptor 3                                                  |
| NM_001004070 | Ng3            | Ng3 protein                                                                                 |

|              |                      |                                                                                                             |
|--------------|----------------------|-------------------------------------------------------------------------------------------------------------|
| NM_001009681 | Oasl1                | 2-5 oligoadenylate synthetase-like 1                                                                        |
| NM_024126    | Odf1                 | outer dense fiber of sperm tails 1                                                                          |
| NM_017213    | Odf2                 | outer dense fiber of sperm tails 2                                                                          |
| NM_001000423 | Olr1106_predicted    | olfactory receptor 1106 (predicted)                                                                         |
| XM_340798    | P4ha2_predicted      | procollagen-proline, 2-oxoglutarate 4-dioxygenase (proline 4-hydroxylase), alpha II polypeptide (predicted) |
| XM_215701    | Papss1_predicted     | 3-phosphoadenosine 5-phosphosulfate synthase 1 (predicted)                                                  |
| NM_138543    | Pde9a                | phosphodiesterase 9A                                                                                        |
| NM_013005    | Pik3r1               | phosphatidylinositol 3-kinase, regulatory subunit, polypeptide 1                                            |
| XM_344756    | Pou4f2               | POU domain, class 4, transcription factor 2                                                                 |
| XM_344675    | Pou4f3_predicted     | POU domain, class 4, transcription factor 3 (predicted)                                                     |
| NM_001002855 | Prm3                 | protamine 3                                                                                                 |
| NM_182949    | Prss27               | protease, serine 27                                                                                         |
| XM_001062978 | Ptpnc1               | protein tyrosine phosphatase, receptor type, C                                                              |
| NM_001013427 | Rarres2              | retinoic acid receptor responder (tazarotene induced) 2                                                     |
| XM_216027    | RGD1306233_predicted | similar to hypothetical protein MGC29761 (predicted)                                                        |
| NM_001014116 | RGD1307381           | similar to RIKEN cDNA 2610003J06                                                                            |
| XM_574348    | RGD1559613_predicted | RGD1559613 (predicted)                                                                                      |
| XM_345031    | RGD1559756_predicted | similar to tolloid-like-2 protein (predicted)                                                               |
| XM_346362    | RGD1561261_predicted | similar to tolloid-like-2 protein 2 (the cerebellum 3) (predicted)                                          |
| XM_574375    | RGD1563892_predicted | similar to MGC15476 protein (predicted)                                                                     |
| XM_223466    | RGD1564950_predicted | similar to Hypothetical protein, MNCb-2622 (predicted)                                                      |
| XM_224926    | RGD1566335_predicted | similar to FKSG89 (predicted)                                                                               |
| NM_053764    | Rgs14                | regulator of G-protein signaling 14                                                                         |
| NM_001011904 | Rnf10                | ring finger protein 10                                                                                      |
| XM_223534    | Sh3bp2               | SH3-domain binding protein 2                                                                                |
| NM_001002852 | Spata4               | spermatogenesis associated 4                                                                                |
| NM_199088    | Stk22s1              | serine/threonine kinase 22 substrate 1                                                                      |
| XM_341215    | Tbc1d1_predicted     | TBC1 domain family, member 1 (predicted)                                                                    |
| NM_012675    | Tnf                  | tumor necrosis factor (TNF superfamily, member 2)                                                           |
| NM_001008881 | Tpil4                | trypsin protease inhibitor-like 4                                                                           |
| NM_001004278 | Tsga10ip             | testis specific 10 interacting protein                                                                      |
| NM_022589    | Tspan2               | tetraspanin 2                                                                                               |
| NM_133526    | Tspan8               | tetraspanin 8                                                                                               |
| NM_001039163 | Tusc5                | tumor suppressor candidate 5                                                                                |
| NM_173147    | Vps54                | vacuolar protein sorting 54 (yeast)                                                                         |
| XM_575403    | Wnt16                | wingless-related MMTV integration site 16                                                                   |
| NM_001004444 | Zbtb1                | zinc finger and BTB domain containing 1                                                                     |
