# Supplementary material
Source: PubMed Central journal article supplement (PMC3076804)
Supplement: NIHMS252373-supplement-Supp_Table_S2.pdf [file NIHMS252373-supplement-Supp_Table_S2.pdf]

**Supplement Table 2. Alcohol prevented these genes from hypomethylation during differentiation**

| Genbank ID   | Gene.symbol          | Description                                                                                  |
|--------------|----------------------|----------------------------------------------------------------------------------------------|
| XM_236614    | Armet_predicted      | arginine-rich, mutated in early stage tumors (predicted)                                     |
| XM_573881    | LOC498604            | similar to B-cell novel protein 1                                                            |
| NM_001024352 | LOC500827            | similar to hypothetical protein FLJ35821                                                     |
| XM_001069437 | LOC689081            | similar to cystatin E2                                                                       |
| XM_001073153 | LOC689869            | similar to Taste receptor type 2 member 140 (T2R140) (T2R40) (T2R8) (T2R13) (mT2r64) (mTRB3) |
| NM_001007733 | Nudt5                | nudix (nucleoside diphosphate linked moiety X)-type motif 5                                  |
| NM_001000427 | Olr1139_predicted    | olfactory receptor 1139 (predicted)                                                          |
| NM_001000103 | Olr1646_predicted    | olfactory receptor 1646 (predicted)                                                          |
| NM_001000197 | Olr214_predicted     | olfactory receptor 214 (predicted)                                                           |
| NM_001001039 | Olr304_predicted     | olfactory receptor 304 (predicted)                                                           |
| NM_001000384 | Olr408_predicted     | olfactory receptor 408 (predicted)                                                           |
| NM_001000926 | Olr611_predicted     | olfactory receptor 611 (predicted)                                                           |
| XM_237786    | RGD1305687_predicted | similar to D11Bwg0434e protein (predicted)                                                   |
| NM_001013998 | RGD1310975           | similar to CG31759-PA                                                                        |
| NM_001025150 | RGD1562314_predicted | putative taste receptor T2R18 (predicted)                                                    |
| NM_031100    | Rpl10                | ribosomal protein L10                                                                        |
| NM_173336    | Tas2r123             | taste receptor, type 2, member 123                                                           |
| NM_023997    | Tas2r7               | taste receptor, type 2, member 7                                                             |
| XM_341125    | Tmem58_predicted     | transmembrane protein 58 (predicted)                                                         |
